# Supplementary material for: Life Cycle Assessment of Boron Industry from Mining to Refined Products
Source: MDPI journal article supplement (doi:10.3390/su14031787), 2022-02-04
Supplement: s1 [file s1]

# Life Cycle Assessment of Boron Industry from Mining to Refined Products

Tuğçe Türkbay <sup>1</sup>, Bertrand Laratte <sup>1,2,3,4,\*</sup>, Ayşenur Çolak <sup>2</sup>, Semra Çoruh <sup>5</sup> and Birol Elevli <sup>2</sup>

<sup>1</sup> Arts et Métiers Institute of Technology, University of Bordeaux, CNRS, Bordeaux INP, INRAE, I2M Bordeaux, F-33400 Talence, France; tugce.turkbay@ensam.eu (T.T.); bertrand.laratte@ensam.eu (B.L.)

<sup>2</sup> Department of Industrial Engineering, Ondokuz Mayıs University, Samsun 55139, Turkey; 21280873@stu.omu.edu.tr (A.Ç.); birol.elevli@omu.edu.tr (B.E.)

<sup>3</sup> APESA-Innovation, F-40220 Tarnos, France

<sup>4</sup> French Institute of Anatolian Studies, CNRS USR 3131,, 34433 Beyoğlu/İstanbul, Turkey

<sup>5</sup> Department of Environmental Engineering, Ondokuz Mayıs University, Samsun 55139, Turkey; sem-coruh@omu.edu.tr;

\* Correspondence: bertrand.laratte@ensam.eu

**Table S1.** Life cycle inventory for boric acid inputs.

|                                                         | Input                        | Output        | Amount  | Unit                           | Ref. |
|---------------------------------------------------------|------------------------------|---------------|---------|--------------------------------|------|
| Mining inventory for 1 ton of run-of-colemanite         | Diesel                       |               | 0.3769  | kgdiesel/tonore                | [4]  |
|                                                         | Oil                          |               | 0.0240  | kgoil/tonore                   | [4]  |
|                                                         | Dynamite                     |               | 0.0021  | kgdynamite/tonore              | [4]  |
|                                                         | T.A.N.                       |               | 0.0454  | kgT.A.N./tonore                | [4]  |
|                                                         | Electric Capsule             |               | 0.0028  | Piececapsul/tonore             | [4]  |
|                                                         | Copper (Electric Capsule)    |               | 0.00194 | gcopper/piececapsul            | [5]  |
|                                                         | PVC (Electric Capsule)       |               | 0.01381 | gPVC/piececapsul               | [5]  |
|                                                         | Energy                       |               | 0.7017  | kWh/tonore                     | [4]  |
|                                                         |                              | Overburden    | 9.85    | tonoverburden/tonore           | [2]  |
| Concentrator inventory for 1 ton of concentrate product | Colemanite ore consumption   |               | 1.3490  | tonore/tonconc                 | [1]  |
|                                                         | Water                        |               | 4.1797  | tonwater/tonconc               | [1]  |
|                                                         | Diesel                       |               | 0.4120  | kgdiesel/tonconc               | [4]  |
|                                                         | Oil                          |               | 0.0417  | kgoil/tonconc                  | [4]  |
|                                                         | Electricity                  |               | 7.4713  | kWh/tonconc                    | [4]  |
|                                                         | Water                        |               | 4.1923  | m3/ton/tonconc                 | [1]  |
|                                                         |                              | Water         | 3.1012  | tonwater/tonconc               | [1]  |
|                                                         |                              | Mineral waste | 0.3490  | tonwaste/tonconc               | *    |
| Refinement inventory for 1 ton boric acid product       | Conc. colemanite consumption |               | 1.5     | tonconc/tonboric_acid          | [3]  |
|                                                         | Sulfuric Acid                |               | 0.9     | tonsulfuric_acid/tonboric_acid | [3]  |
|                                                         | Electricity                  |               | 130     | kWh/tonboric_acid              | [3]  |
|                                                         | Steam                        |               | 1       | tonsteam/tonboric_acid         | [3]  |
|                                                         | Water                        |               | 25      | tonwater/tonboric_acid         | [3]  |
|                                                         | Compressed Air               |               | 15      | m3compressed_air/tonboric_acid | [3]  |
|                                                         | Fuel-Oil                     |               | 48      | kmfuel_oil/tonboric_acid       | [3]  |
|                                                         |                              | Sludge        | 0.9171  | tonsludge/tonboric_acid        | *    |
|                                                         |                              | Mineral waste | 0.4171  | tonwaste/tonboric_acid         | *    |

<sup>1</sup> Estimated data are indicated by the \* symbol in the reference column.

## Calculations for Table S1

### (a) Input for Water (in concentrator):

The water used at Bigadiç concentrator facility is 2,250,000 m<sup>3</sup>/year [1].

The processed run-of-colemanite ore in the concentrator facility is 724,000 ton/year [1].

The produced concentrated colemanite ore is 536,700 ton/year [1].

The water to produce 1 ton concentrated colemanite =  
 $(2,250,000 \text{ m}^3/\text{year}) / (536,700 \text{ ton/year}) = 4.1923 \text{ m}^3/\text{ton}$ .

### (b) Input for run-of-colemanite-ore (in concentrator):

The processed run-of-colemanite ore in the concentrator facility is 724,000 ton/year [1].

The produced concentrated colemanite ore is 536,700 ton/year [1].

The processed run-of-colemanite ore to produce 1 ton concentrated colemanite =  
 $(724,000 \text{ ton/year}) / (536,700) = 1.3490 \text{ ton/ton}$ .

### (c) Output for Waste Water (in concentrator):

The waste water at Bigadiç concentrator facility is 190 ton/hour [1].

Therefore, the waste water  $(190 \text{ ton/hour}) \times (24 \text{ hour}) \times (365 \text{ days}) = 1,664,400 \text{ ton/year}$ .

The produced concentrated colemanite ore is 536,700 ton/year [1].

The waste water to produce 1 ton concentrated colemanite =  
 $(1,664,400 \text{ ton/year}) / (536,700 \text{ ton/year}) = 3.1012 \text{ ton/ton}$ .

**(d) Output for Overburden (open-pit-mining):**

The overburden per run-of colemanite ore at Bigadiç facility is 4.07 m<sup>3</sup>/ton [2]. The density of run of colemanite ore is 2.42 g/cm<sup>3</sup>. Therefore the amount of overburden is 4.07 \* 2.42 = 9.85 ton/ton.

**(e) Output for Mineral Waste (in concentrator):**

The processed run-of-colemanite ore to produce 1 ton concentrated colemanite =

$$(724,000 \text{ ton/year}) / (536,700) = 1.3490 \text{ ton (b)}$$

The mineral waste to produce 1 ton concentrated colemanite =

$$(1.3490 \text{ ton run-of-colemanite ore}) - (1 \text{ ton concentrated colemanite}) = 0.3490 \text{ ton/ton. (Assumption)}$$

**(f) Output for Sludge and Mineral Waste (refining for sodium perborate):**

There is no information about the sludge and mineral waste of boric acid in the literature. Therefore, the assumptions will be done based on borax pentahydrate production.

The processed concentrated tincal to produce 1 ton borax pentahydrate = 2.3 ton

The processed concentrated colemanite to produce 1 ton boric acid = 1.5 ton

The sludge waste to produce 1 ton borax pentahydrate = 1.40625 ton/ton.

The sludge waste to produce 1 ton borax decahydrate =

$$(1.5 \text{ ton}) * (1.40625 \text{ ton/ton}) / (2.3 \text{ ton}) = 0.9171 \text{ ton}$$

The mineral waste to produce 1 ton borax decahydrate =

$$(1.5 \text{ ton concentrated colemanite}) - (1 \text{ ton boric acid}) = 0.5 \text{ ton/ton.}$$

The final mineral waste =

$$0.9171 \text{ ton/ton} - 0.5 \text{ ton/ton} = 0.4171 \text{ ton/ton.}$$

**Table S2.** Life cycle inventory for borax pentahydrate, borax decahydrate, and sodium perborate inputs.

|                                                         | Input                                | Output        | Amount  | Unit                           | Ref. |
|---------------------------------------------------------|--------------------------------------|---------------|---------|--------------------------------|------|
| Mining inventory for 1 ton of run-of-tincal             | Diesel                               |               | 0.4318  | kgdiesel/tonore                | [4]  |
|                                                         | Oil                                  |               | 0.019   | kgoil/tonore                   | [4]  |
|                                                         | Electricity                          |               | 0.296   | kWh/tonore                     | [4]  |
|                                                         | Dynamite                             |               | 0.076   | kgdynamite/tonore              | [4]  |
|                                                         | T.A.N.                               |               | 0.003   | kgT.A.N./tonore                | [4]  |
|                                                         | Electric Capsule                     |               | 0.002   | Piececapsul/tonore             | [4]  |
|                                                         | Copper (Electric Capsule)            |               | 0.0014  | gcopper/piececapsul            | [5]  |
|                                                         | PVC (Electric Capsule)               |               | 0.00998 | gPVC/piececapsul               | [5]  |
|                                                         |                                      | Overburden    | 9.77    | tonoverburden/tonore           | *    |
| Concentrator inventory for 1 ton of concentrate product | Tincal ore consumption               |               | 3.306   | tonore/tonconc                 | [1]  |
|                                                         | Diesel                               |               | 0.0940  | kgdiesel/tonconc               | [4]  |
|                                                         | Oil                                  |               | 0.0277  | kgoil/tonconc                  | [4]  |
|                                                         | Electricity                          |               | 11.1995 | kWh/tonconc                    | [4]  |
|                                                         | Gasoline                             |               | 0.0036  | kggasoline/tonconc             | [4]  |
|                                                         | Water                                |               | 4.4673  | m3/ton/tonconc                 | *    |
|                                                         |                                      | Water         | 3.375   | tonwater/tonconc               | [6]  |
|                                                         |                                      | Mineral waste | 0.4375  | tonwaste/tonconc               | [6]  |
|                                                         |                                      | Sludge        | 0.15625 | tonsludge/tonconc              | [7]  |
| Refinement inventory for 1 ton borax pentahydrate       | Conc. tincal consumption             |               | 2.3     | tonconc/tonborax_pentahydrate  | [3]  |
|                                                         | Flocculant (nonionic polyacrylamide) |               | 0.3     | kgfloc./tonborax_pentahydrate  | [3]  |
|                                                         | Electricity                          |               | 130     | kWh/tonborax_pentahydrate      | [3]  |
|                                                         | Steam                                |               | 5       | tonsteam/tonborax_pentahydrate | [3]  |
|                                                         | Water                                |               | 45      | tonwater/tonborax_pentahydrate | [3]  |

|                                                  |                                      |               |         |                                 |     |
|--------------------------------------------------|--------------------------------------|---------------|---------|---------------------------------|-----|
|                                                  |                                      | Mineral waste | 0.7375  | tonwaste/tonborax_pentahydrate  | *   |
|                                                  |                                      | Sludge        | 1.40625 | tonsludge/tonborax_pentahydrate | *   |
| Refinement inventory for 1 ton borax decahydrate | Conc. tincal consumption             |               | 1.7     | tonconc/tonborax_decahydrate    | [3] |
|                                                  | Flocculant (nonionic polyacrylamide) |               | 0.3     | kgfloc/tonborax_decahydrate     | [3] |
|                                                  | Electricity                          |               | 125     | kWh/tonborax_decahydrate        | [3] |
|                                                  | Steam                                |               | 2       | tonsteam/tonborax_decahydrate   | [3] |
|                                                  | Water                                |               | 14      | tonwater/tonborax_decahydrate   | [3] |
|                                                  |                                      | Mineral waste | 0.2844  | tonwaste/tonborax_decahydrate   | *   |
|                                                  |                                      | Sludge        | 0.4156  | tonsludge/tonborax_decahydrate  | *   |
| Refinement inventory for 1 ton sodium perborate  | Conc. tincal consumption             |               | 1.1     | tonconc/tonsodium_perborate     | [3] |
|                                                  | NaOH (48 %)                          |               | 0.3     | tonNaOH/tonsodium_perborate     | [3] |
|                                                  | H2O2 (70 %)                          |               | 0.3     | tonH2O2/tonsodium_perborate     | [3] |
|                                                  | Flocculant (nonionic polyacrylamide) |               | 0.3     | kgfloc/tonsodium_perborate      | [3] |
|                                                  | Electricity                          |               | 110     | kWh/tonsodium_perborate         | [3] |
|                                                  | Steam                                |               | 1       | tonsteam/tonsodium_perborate    | [3] |
|                                                  | Water                                |               | 6       | tonwater/tonsodium_perborate    | [3] |
|                                                  |                                      | Mineral waste | 0.269   | tonwaste/tonsodium_perborate    | *   |

<sup>1</sup>Estimated data are indicated by the \* symbol in the reference column.

## Calculations for Table S2

### (g) Input for Water (in concentrator):

The water to produce 1 ton concentrated colemanite (a) =  $(2,250,000 \text{ m}^3/\text{year}) / (536,700 \text{ ton}/\text{year}) = 4.1923 \text{ m}^3/\text{ton}$ .

This value assumed the same at Kırka facility to produce tincal, as well.

At Bigadiç, 4.1923 m<sup>3</sup>/ton water is necessary to process 1.3490 ton run-of-colemanite-ore.

At Kırka, 1.4375 ton run-of-tincal-ore is processed per ton of concentrated tincal.

The water to produce 1 ton concentrated tincal =  $(1.4375 \text{ ton run-of-tincal-ore}) * (4.1923 \text{ m}^3/\text{ton water}) / (1.3490 \text{ ton run-of-colemanite-ore}) = 4.4673 \text{ m}^3/\text{ton}$ . (Assumption)

### (h) Input for run-of-tincal-ore (in concentrator):

The processed run-of-tincal ore in the concentrator facility is 1,150,000 ton/year [4].

The produced concentrated tincal ore is 800,000 ton/year [4].

The processed run-of-colemanite ore to produce 1 ton concentrated colemanite =  $(1,150,000 \text{ ton}/\text{year}) / (800,000) = 1.4375 \text{ ton}/\text{ton}$ .

**(i) Output for Overburden (open-pit-mining):** The overburden per run-of colemanite ore at Bigadiç facility is 4.07 m<sup>3</sup>/ton [2].

This value assumed the same at Kırka facility to produce tincal, as well.

The density of run of tincal ore is 2.4 g/cm<sup>3</sup>.

Therefore the amount of overburden is  $4.07 * 2.4 = 9.77 \text{ ton}$ .

**(j) Output for Waste Water (in concentrator):**

The waste water at Kirka concentrator facility is 2,700,000 ton/year [6].

The produced concentrated tincal ore is 800,000 ton/year [4].

The waste water to produce 1 ton concentrated tincal =  
 $(2,700,000 \text{ ton/year}) / (800,000 \text{ ton/year}) = 3.375 \text{ ton/ton}$ .

**(k) Output for Mineral Waste (in concentrator):**

The processed run-of-colemanite ore to produce 1 ton concentrated colemanite is 1.4375 ton (g).

The mineral waste to produce 1 ton concentrated tincal =  
 $(1.4375 \text{ ton run-of-tincal ore}) - (1 \text{ ton concentrated tincal}) = 0.4375 \text{ ton/ton}$ . (Assumption)

► Second approach:

The waste mineral at Kirka concentrator facility is 350,000 ton/year [6].

The produced concentrated tincal ore is 800,000 ton/year [4].

The mineral waste to produce 1 ton concentrated tincal =  
 $(350,000 \text{ ton/year}) / (800,000 \text{ ton/year}) = 0.4375 \text{ ton/ton}$ .

**(l) Output for Sludge Waste (in concentrator):**

The sludge waste at Kirka concentrator facility is 125,000 ton/year [7].

The produced concentrated tincal ore is 800,000 ton/year [4].

The sludge waste to produce 1 ton concentrated tincal =  
 $(125,000 \text{ ton/year}) / (800,000 \text{ ton/year}) = 0.15625 \text{ ton/ton}$ .

**(m) Output for Sludge Waste (refining for borax pentahydrate):**

The sludge waste at Kirka refinement facility is 450,000 ton/year. (Approximately 40 % of this sludge is composed of solid waste.) [6].

The produced borax pentahydrate is 320,000 ton/year [6].

The sludge waste to produce 1 ton borax pentahydrate =  
 $(450,000 \text{ ton/year}) / (320,000 \text{ ton/year}) = 1.40625 \text{ ton/ton}$ .

**(n) Output for Mineral Waste (refining for borax pentahydrate):**

The sludge waste to produce 1 ton borax pentahydrate =  
 $(450,000 \text{ ton/year}) / (320,000 \text{ ton/year}) = 1.40625 \text{ ton/ton}$ .

(Approximately 40 % of this sludge is composed of solid waste.) [6].

The solid waste in sludge to produce 1 ton borax pentahydrate =  
 $(1.40625 \text{ ton/ton}) * (0.40) = 0.5625 \text{ ton/ton}$

The processed concentrated tincal ore to produce 1 ton borax pentahydrate is 2.3 ton.

The mineral waste to produce 1 ton borax pentahydrate =  
 $(2.3 \text{ ton concentrated tincal}) - (1 \text{ ton borax pentahydrate}) = 1.3 \text{ ton/ton}$ .

The final mineral waste =

$1.3 \text{ ton/ton} - 0.5625 \text{ ton/ton} = 0.7375 \text{ ton/ton}$ .

**(o) Output for Sludge and Mineral Waste (refining for borax decahydrate):**

There is no information about the mineral waste of borax decahydrate in the literature. Therefore, the assumptions will be done based on borax pentahydrate production.

The processed concentrated tincal to produce 1 ton borax pentahydrate = 2.3 ton

The processed concentrated tincal to produce 1 ton borax decahydrate = 1.7 ton

The sludge waste to produce 1 ton borax pentahydrate = 1.40625 ton/ton.

The sludge waste to produce 1 ton borax decahydrate =  
 $(1.7 \text{ ton}) * (1.40625 \text{ ton/ton}) / (2.3 \text{ ton}) = 1.039 \text{ ton}$

(Approximately 40 % of this sludge is composed of solid waste.) [6].

The solid waste in sludge to produce 1 ton borax decahydrate =  
 $(1.039 \text{ ton/ton}) * (0.40) = 0.4156 \text{ ton/ton}$

The mineral waste to produce 1 ton borax decahydrate =  
 $(1.7 \text{ ton concentrated tincal}) - (1 \text{ ton borax decahydrate}) = 0.7 \text{ ton/ton}$ .

The final mineral waste =

$0.7 \text{ ton/ton} - 0.4156 \text{ ton/ton} = 0.2844 \text{ ton/ton}$ .

**(p) Output for Sludge and Mineral Waste (refining for sodium perborate):**

There is no information about the mineral waste of sodium perborate in the literature. Therefore, the assumptions will be done based on borax pentahydrate production.

The processed concentrated tincal to produce 1 ton borax pentahydrate = 2.3 ton

The processed concentrated tincal to produce 1 ton sodium perborate = 1.1 ton  
The sludge waste to produce 1 ton borax pentahydrate = 1.40625 ton/ton.  
The sludge waste to produce 1 ton sodium perborate =  
 $(1.1 \text{ ton}) * (1.40625 \text{ ton/ton}) / (2.3 \text{ ton}) = 0.6725 \text{ ton}$   
(Approximately 40 % of this sludge is composed of solid waste.) [6].  
The solid waste in sludge to produce 1 ton sodium perborate =  
 $(0.6725 \text{ ton/ton}) * (0.40) = 0.269 \text{ ton/ton}$   
The mineral waste to produce 1 ton sodium perborate =  
 $(1.1 \text{ ton concentrated tincal}) - (1 \text{ ton borax decahydrate}) = 0.1 \text{ ton/ton.}$   
The final sludge waste =  
 $0.1 \text{ ton/ton} - 0.269 \text{ ton/ton} = -0.169 \text{ ton/ton.}$   
The result is minus here. Therefore, only solid mineral waste will be used for sodium perborate production.

**Table S3.** Impact assessment of 1 ton boric acid, borax decahydrate, borax pentahydrate, and sodium perborate production (characterization).

| Impact category                          | Unit         | BA       | BD       | BP       | SP       |
|------------------------------------------|--------------|----------|----------|----------|----------|
| Climate change                           | kg CO2 eq    | 495,3125 | 566,0345 | 1262,956 | 1701,519 |
| Ozone depletion                          | kg CFC-11 eq | 0,000121 | 4,89E-05 | 0,000113 | 0,000347 |
| Human toxicity, non-cancer effects       | CTUh         | 0,000329 | 6,58E-05 | 0,000117 | 0,000389 |
| Human toxicity, cancer effects           | CTUh         | 3,08E-05 | 1,31E-05 | 2,29E-05 | 0,000149 |
| Particulate matter                       | kg PM2.5 eq  | 0,902737 | 0,559895 | 0,98549  | 1,61663  |
| Ionizing radiation HH                    | kBq U235 eq  | 53,79986 | 14,93264 | 33,79421 | 164,2083 |
| Ionizing radiation E (interim)           | CTUe         | 0,000286 | 6,83E-05 | 0,000152 | 0,000447 |
| Photochemical ozone formation            | kg NMVOC eq  | 2,624189 | 1,25554  | 2,627465 | 4,533912 |
| Acidification                            | molc H+ eq   | 10,42143 | 3,254536 | 6,912963 | 10,95829 |
| Terrestrial eutrophication               | molc N eq    | 7,414589 | 3,96172  | 8,030616 | 14,31164 |
| Freshwater eutrophication                | kg P eq      | 0,28392  | 0,138333 | 0,214044 | 0,529216 |
| Marine eutrophication                    | kg N eq      | 0,950391 | 0,538293 | 1,024098 | 2,74009  |
| Freshwater ecotoxicity                   | CTUe         | 8941,028 | 1623,265 | 2810,016 | 13586,87 |
| Land use                                 | kg C deficit | 1701,39  | 539,525  | 1203,997 | 1673,557 |
| Water resource depletion                 | m3 water eq  | 14,57281 | 5,599342 | 20,66463 | 12,75312 |
| Mineral, fossil & ren resource depletion | kg Sb eq     | 0,242378 | 0,001981 | 0,003545 | 0,037245 |

The Pedigree Matrix is prepared for Table S1 and S2. Since all the literature sources for the data are the same, same Pedigree Matrix is used for mining, concentrating and refining, see Table S4.

**Table S4.** The Pedigree Matrix.

| Indicator Score | 1 | 2 | 3 | 4 | 5 | Comments                                                                                                         |
|-----------------|---|---|---|---|---|------------------------------------------------------------------------------------------------------------------|
| Reliability     |   | X |   |   |   | The data was taken by the literature. Since it is not taken by the company, they are still not totally reliable. |
| Completeness    |   | X |   |   |   | Because it is representative selection of boron                                                                  |

|                                   |   |  |  |  |   |                                                                                                                                                                              |
|-----------------------------------|---|--|--|--|---|------------------------------------------------------------------------------------------------------------------------------------------------------------------------------|
|                                   |   |  |  |  |   | mining located in Turkey.                                                                                                                                                    |
| Temporal Correlation              |   |  |  |  | X | Age of data is more than 15 years old.                                                                                                                                       |
| Geographical Correlation          | X |  |  |  |   | Boron mining was investigated in this study and the data of Eti Mine was used (using the literature).                                                                        |
| Further technological correlation | X |  |  |  |   | The data found in the literature of Eti Mine Company were used. The data is only related boron mineral processing. The other mineral processes were not used as a reference. |

## References

1. Handırı, İ. Kolemanitten amonyum tuzları, inorganik ve organik asitler kullanılarak borik asit üretimi. Master's Thesis, Süleyman Demirel University, Isparta, Turkey, 2010.
2. Ataş, A. Bigadiç bor açık işletmesinin bilgisayar yardımıyla modellenerek revizyonu. Master's Thesis, Afyon Kocatepe University, Afyonkarahisar, Turkey, 2019.
3. Türkiye Cumhuriyeti Başbakanlık Devlet Planlama Teşkilatı. *Kimya sektörü özel ihtisas komisyonu bor bileşikleri Alt Komisyon Raporu*. Türkiye Cumhuriyeti Başbakanlık Devlet Planlama Teşkilatı, Ankara, Turkey, 1987; pp. 13.
4. Türkiye Cumhuriyeti Başbakanlık Devlet Planlama Teşkilatı. Madencilik özel ihtisas komisyonu raporu. Türkiye Cumhuriyeti Başbakanlık Devlet Planlama Teşkilatı, Ankara, Turkey, 2001; pp. 36-42.
5. Türkiye Cumhuriyeti Başbakanlık Devlet Planlama Teşkilatı. Patlayıcı Maddeler ve Kibritler. Türkiye Cumhuriyeti Başbakanlık Devlet Planlama Teşkilatı, Ankara, Turkey, 1991; pp. 7.
6. Kökkılıç, O. Kırka bor işletmesi atık göletlerindeki sulardan borun kazanılması. Master's Thesis, Istanbul Technical University, Istanbul, Turkey, 2003.
7. Özen, P. Sert porselen gövdelerde bor atığı kullanımı ve karakterizasyonu, Master's Thesis, Anadolu University, Eskişehir, Turkey, 2015.
