# Supplementary material for: Life Cycle Assessment of Boron Industry from Mining to Refined Products
Source: MDPI journal article supplement (doi:10.3390/su14031787), 2022-02-04
Supplement: s1 [file s1]

Archive with 1 entries (1 files):
- sustainability-1523289-supplementary.pdf
